# Supplementary material for: Thermoelectric property enhancement by merging bands in NbFeSb-based half-Heusler mixtures
Source: Royal Society of Chemistry journal article supplement (doi:10.1039/d1ta09660e), 2022-01-01
Supplement: d1ta09660e1.pdf [file d1ta09660e1.pdf]

## Supplementary Information

### Thermoelectric property enhancement by merging bands in NbFeSb-based half-Heusler mixtures

Zhuoyang Ti<sup>a, b</sup>, Shuping Guo<sup>a, c</sup>, Xuemei Zhang<sup>a, b</sup>, Jingyu Li<sup>a</sup>, Yongsheng Zhang<sup>\* a, b, c</sup>

<sup>a</sup> Key laboratory of Materials Physics, Institute of Solid State Physics, HFIPS, Chinese Academy of Sciences, Hefei 230031, China

<sup>b</sup> Science Island Branch of Graduate School, University of Science and Technology of China, Hefei 230026, China

<sup>c</sup> Advanced Research Institute of Multidisciplinary Sciences, Qufu Normal University, Qufu, Shandong Province, 273165, China

<sup>d</sup> Institute for Theoretical Solid State Physics, Leibniz IFW Dresden, 01069 Dresden, Germany

\* Corresponding author

Email: [yshzhang@theory.issp.ac.cn](mailto:yshzhang@theory.issp.ac.cn)

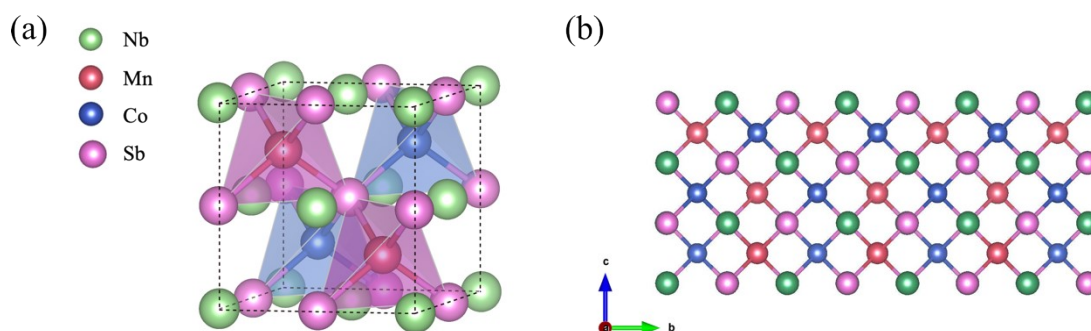

Fig.S1 (a)  $\text{Nb}_4\text{Mn}_2\text{Co}_2\text{Sb}_4$  local geometry structure, (b) View along the  $a$  direction: Mn and Co atoms (or the Mn-Sb and Co-Sb tetrahedrons) are arranged alternately along the  $b$  direction.

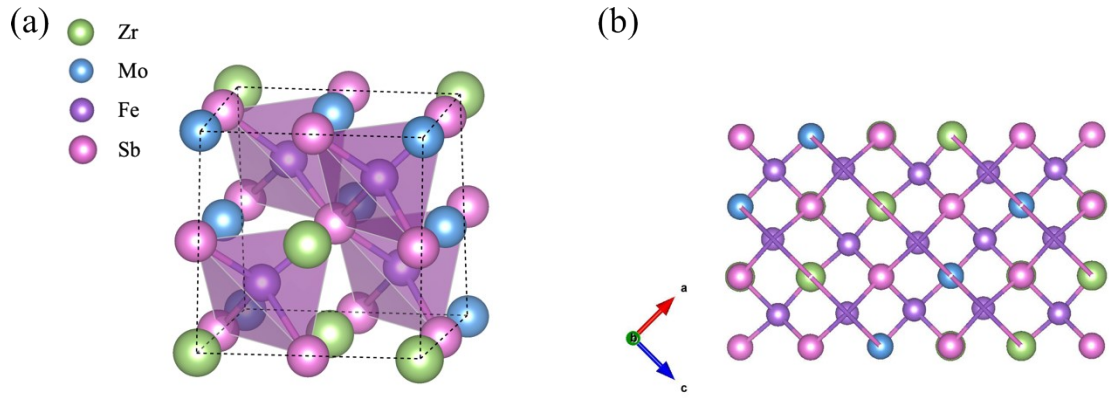

Fig.S2 (a)  $Zr_2Mo_2Fe_4Sb_4$  local geometry structures (b) View along the  $b$  direction: Zr and Mo atoms are arranged alternately, and form a NaCl-sublattice with Sb atoms, Fe atoms fill the center of the tetrahedral consisting of Fe-Sb.

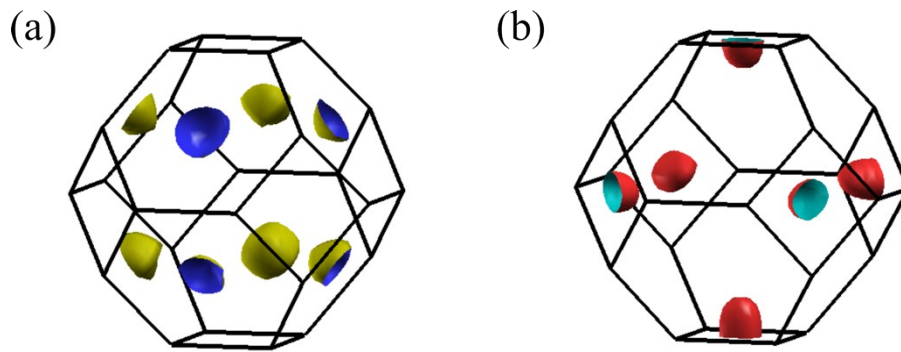

Fig S3 Fermi pockets of NbFeSb at (a) 0.1 eV below the VBM and (b) 0.1 eV above the CBM.

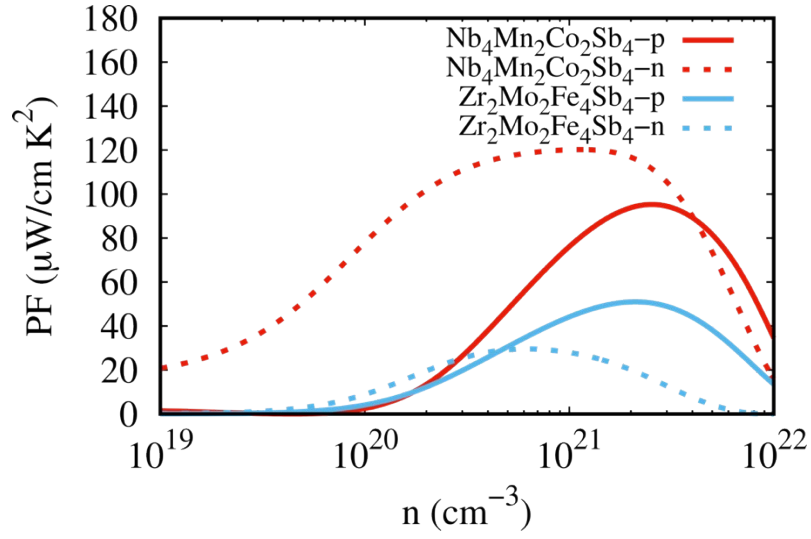

Fig S4 Carrier concentration dependent power factors (PF) of  $\text{Nb}_4\text{Mn}_2\text{Co}_2\text{Sb}_4$  (red lines) and  $\text{Zr}_2\text{Mo}_2\text{Fe}_4\text{Sb}_4$  (blue lines) at 900K. The solid and dash lines represent the p- and n-type thermoelectric properties.

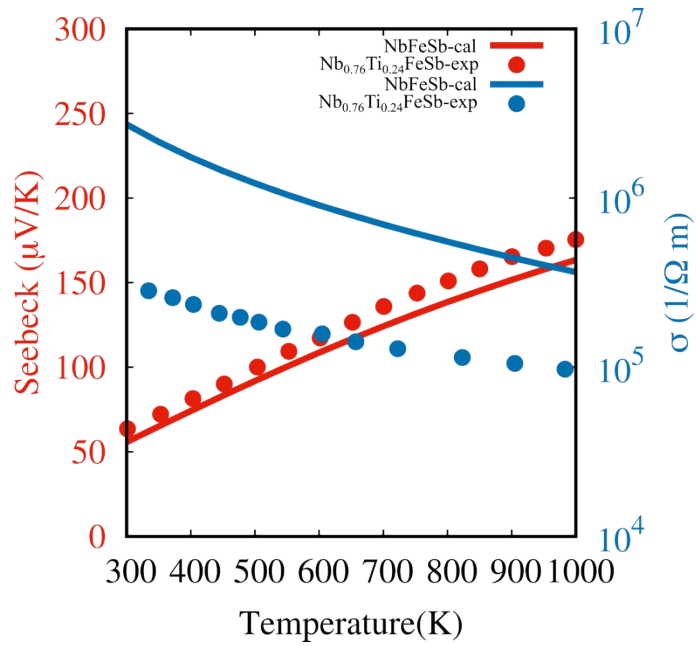

Fig S5 The calculated Seebeck coefficient (the red lines) and electric conductivity (the blue lines) using the deformation potential method. The experimental data (the dotted lines) are taken from Ref [17].

Weighted mobility is defined as:

$$\mu_w = 331 \frac{cm^2}{Vs} \left( \frac{m\Omega cm}{\rho} \right) \left( \frac{T}{300K} \right)^{-\frac{3}{2}} \left[ \frac{\exp \left[ \frac{|S|}{k_B/e} - 2 \right]}{1 + \exp \left[ -5 \left( \frac{|S|}{k_B/e} - 1 \right) \right]} + \frac{\frac{3}{\pi^2} \frac{|S|}{k_B/e}}{1 + \exp \left[ 5 \left( \frac{|S|}{k_B/e} - 1 \right) \right]} \right] \quad (1)$$

Here,  $\rho$  is the electrical resistivity in  $m\Omega cm$ ,  $T$  is the absolute temperature in  $K$ ,  $S$  is the Seebeck coefficient, and  $k_B/e = 86.3 \mu V K^{-1}$ .

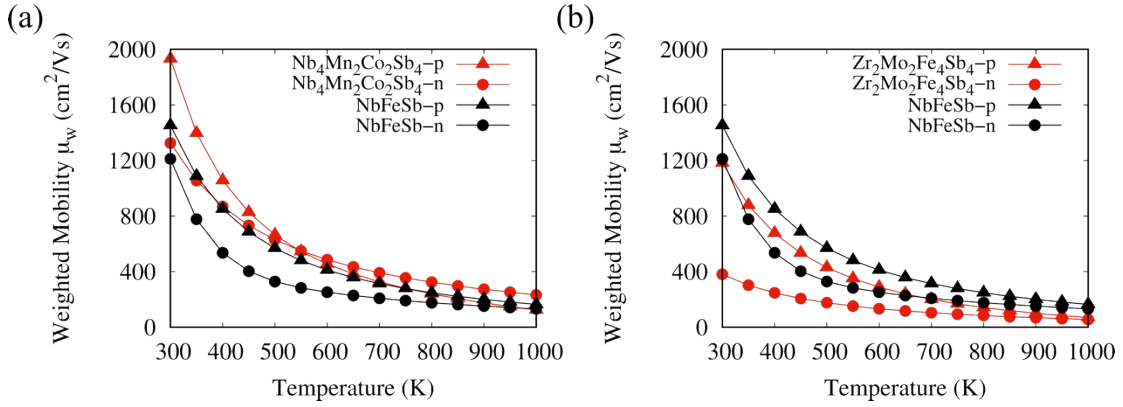

Fig S6 Weighted mobilities of  $Nb_4Mn_2Co_2Sb_4$  (the red lines in a) and  $Zr_2Mo_2Fe_4Sb_4$  (the red lines in b) compared with  $NbFeSb$  (the black lines). The triangle and circle lines represent the p- and n-type thermoelectric properties.
